# Supplementary material for: FGFR1 is a Potential Therapeutic Target in Neuroblastoma
Source: Research Square preprint supplement (doi:10.21203/rs.3.rs-1353035/v1), 2022-02-16
Supplement: Supplementary file 1 [file fb9a097bbc210c62f1179a13.docx]

**Supplementary data**

**
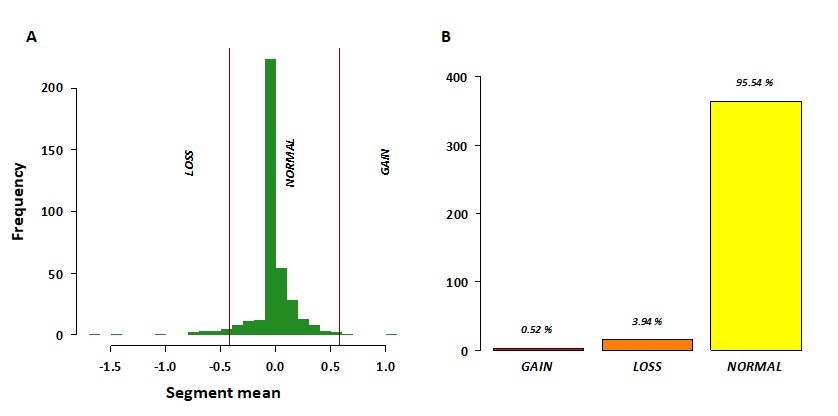
**

**Supplementary Fig. 1** FGFR1 CNVs in TARGET-NB samples. (A) Histogram reporting the distribution (y axis) of segmented Log R Ratio LRR values (x axis) for the cohort of 381 samples in the TARGET-NB project. Red vertical lines represent the cutoffs we used to call copy number (CN) changes. LOSS: LRR < -0.42(CN<1.5); NORMAL: -0.42 ≥ LRR > 0.58 (CN ranging from 1.5 to 3); GAIN: 0.58 ≥ LRR > 1.3 (CN ranging from 3 to 4.9); AMPLIFICATION: LRR ≥ 1.3 (CN≥4.9). (B) Bar plot showing the three CN categories we identified by using the thresholds described above


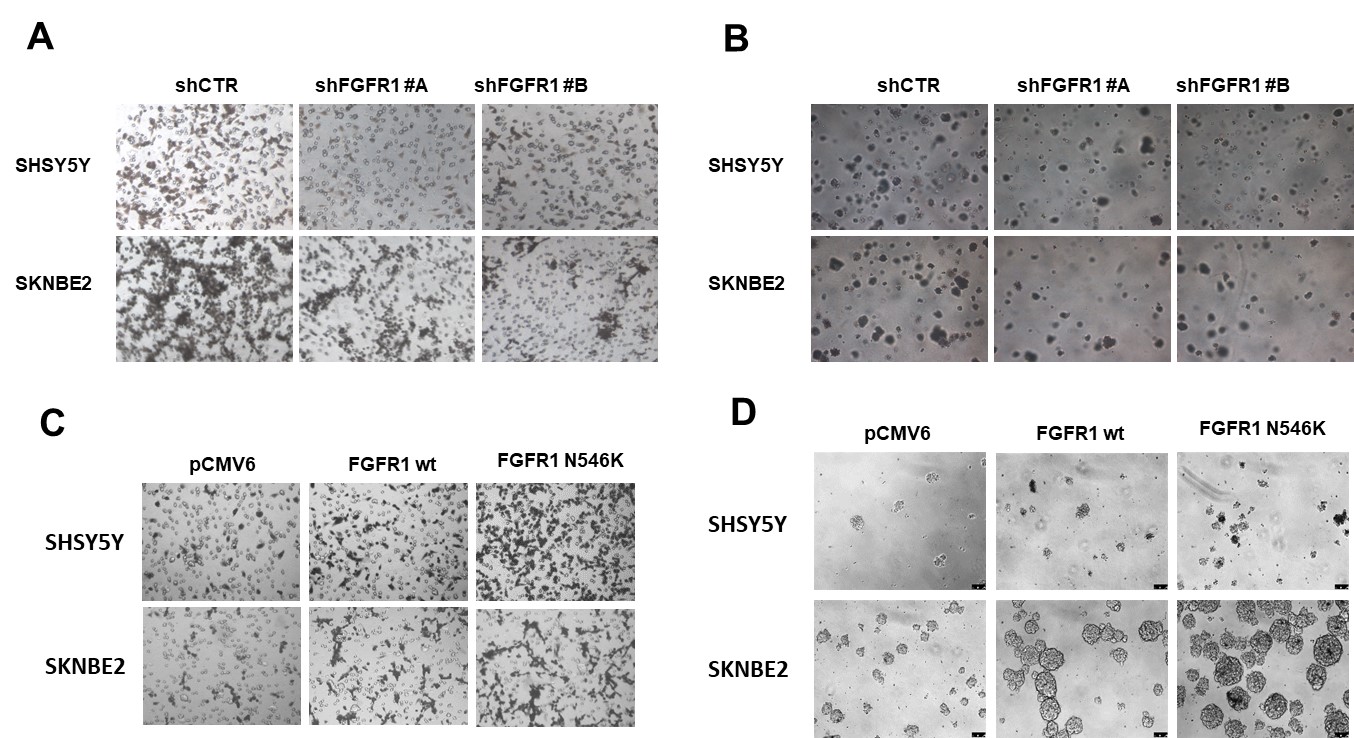


**Supplementary Fig. 2** Representative images of (A) invasion and (B) soft-agar assays in silenced *FGFR1* SHSY5Y and SKNBE2 cells. (C) Invasion and (D) neurosphere assays in *FGFR1* overexpressing cells are shown


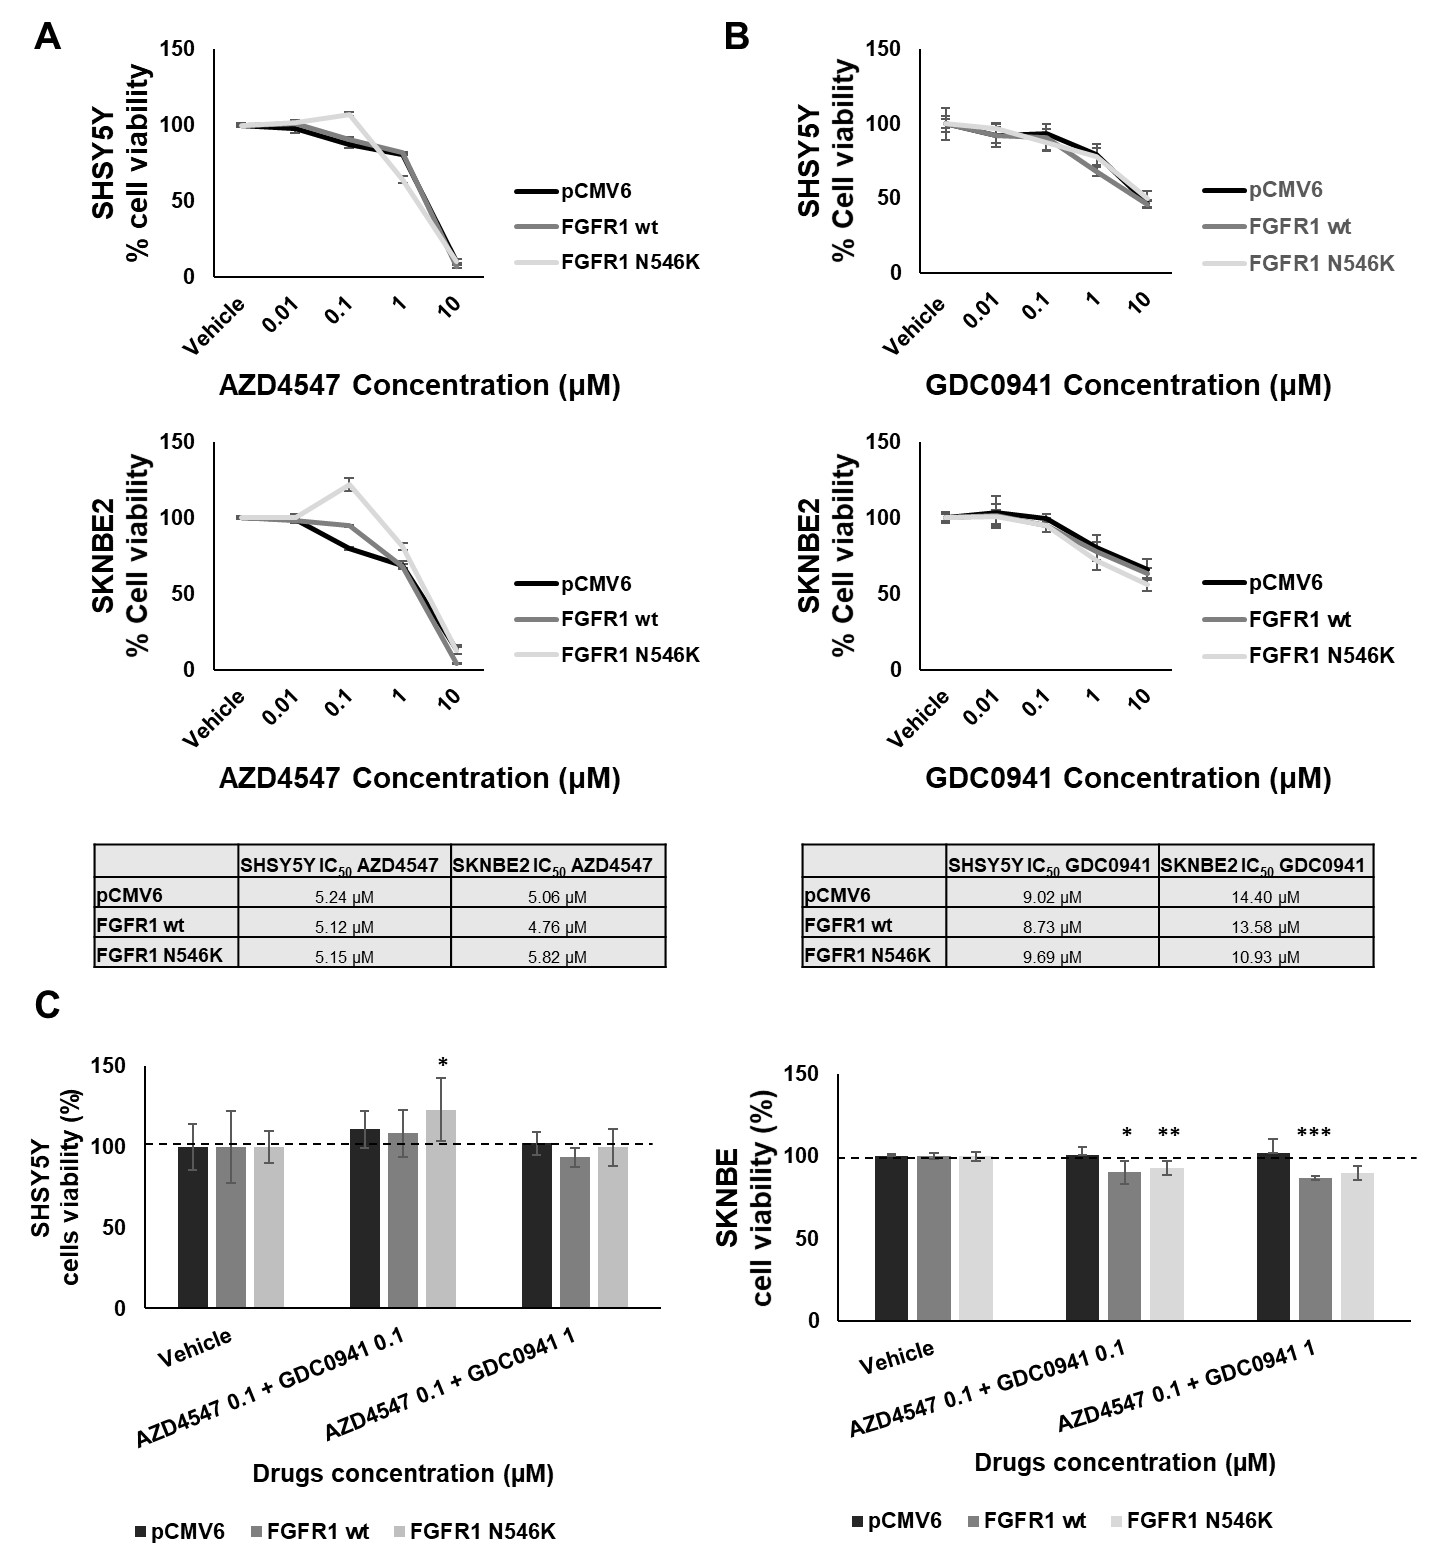


**Supplementary Fig. 3** SH5YSY and SKNBE2 cells were transiently transfected with pCMV6- empty vector, pCMV6- -FGFR1wt, pCMV6- - FGFR1N546K.In these cell lines, MTT assay to determine the IC50 value of (A) AZD4547 and (B) GDC0941 to analyze their effect on cell viability (%). The IC50 value (that is, the concentration of drug which exhibited 50% cell) are reported in table under the corresponding graph. (C) Bar plot represented the cell viability (%) of described above cell lines treated with different concentrations of AZD4547 and GDC0941 combination. Vehicle=DMSO. * = *p*-value ≤ 0.05, ** = *p-*value ≤ 0.01, *** = *p-*value ≤ 0.001


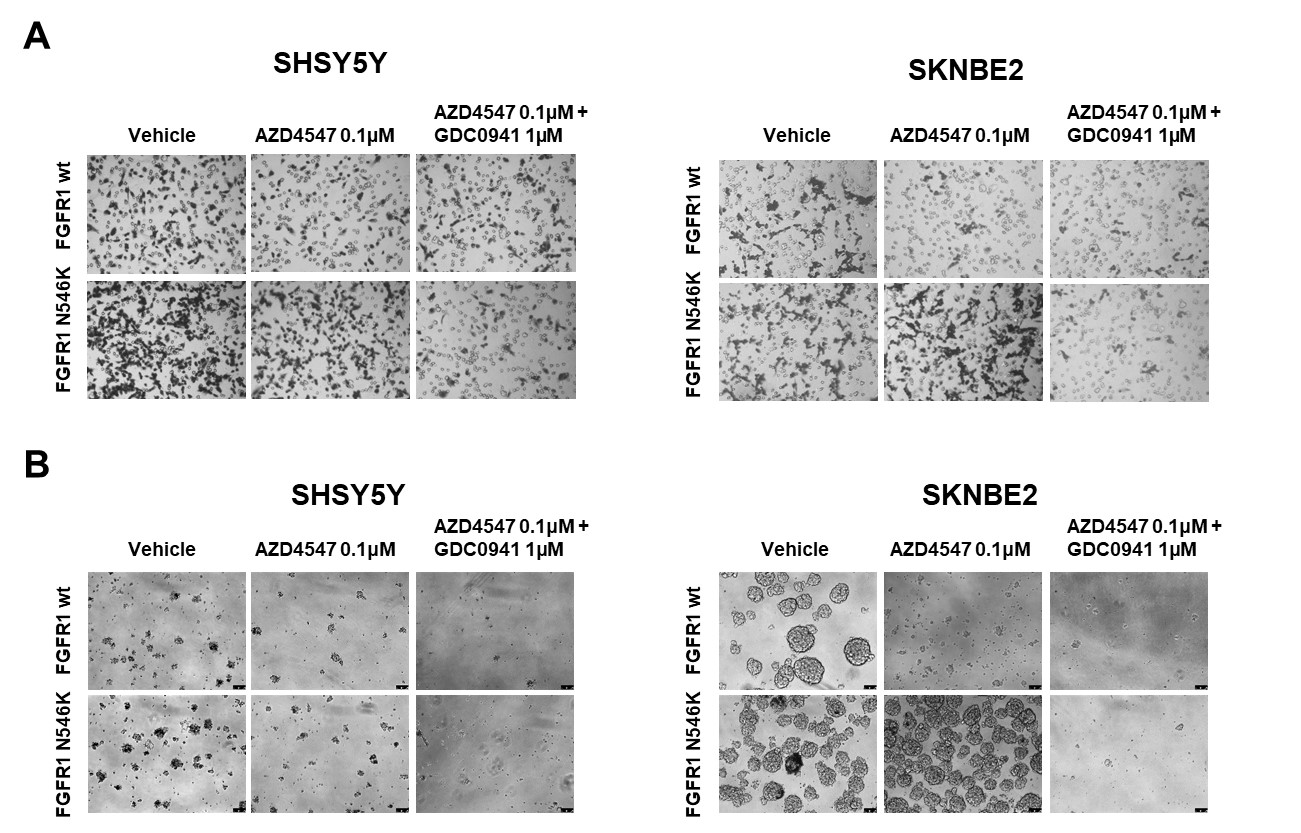


**Supplementary Fig. 4** Representative images of (A) the invasion assay and (B) neurospheres assay in SHSY5Y and SKNBE2 overexpressing FGFR1wt or FGFR1N546K cells after treatment with AZD4547 0.1µM alone and in combination with GDC0941 1µM. Vehicle=DMSO
